# Supplementary material for: Risk Factors Associated With Atrioventricular Block
Source: PubMed Central journal article supplement (PMC6632153; doi:10.1001/jamanetworkopen.2019.4176), 2019-05-24
Supplement: jamanetwopen-2-e194176-s001.pdf [file jamanetwopen-2-e194176-s001.pdf]

## Supplementary Online Content

Kerola T, Eranti A, Aro AL, et al. Risk factors associated with atrioventricular block. *JAMA Netw Open*. 2019;2(5):e194176. doi:10.1001/jamanetworkopen.2019.4176

**eTable.** Characteristics of the Study Population and Individuals Excluded Due to Early Death (n = 854), Missing/Poor Quality ECG (n = 200), or Other Missing Covariate (n = 17)

This supplementary material has been provided by the authors to give readers additional information about their work.

**eTable.** Characteristics of the Study Population and Individuals Excluded Due to Early Death (n = 854), Missing/Poor Quality ECG (n = 200), or Other Missing Covariate (n = 17)

| Characteristics                               | Study participants (n=6146) | Individuals excluded (n=1071) | p     |
|-----------------------------------------------|-----------------------------|-------------------------------|-------|
| Age, mean (SD), years                         | 49.2 (12.9)                 | 63.8 (14.5)                   | <.001 |
| Sex, n (%), male                              | 2697 (44)                   | 625 (59)                      | <.001 |
| Height, mean, (SD), cm                        | 165.8 (9.4)                 | 164.7 (9.9)                   | <.001 |
| Weight, mean, (SD), kg                        | 71.3 (13.0)                 | 70.2 (13.6)                   | <.001 |
| Body mass index, mean (SD), kg/m <sup>2</sup> | 25.9 (4.1)                  | 25.8 (4.2)                    | .054  |
| Heart rate, mean (SD), beats per minute       | 67.5 (13.2)                 | 73.5 (16.4)                   | <.001 |
| Systolic blood pressure, mean (SD), mmHg      | 141.4 (21.8)                | 154.8 (26.7)                  | <.001 |
| Diastolic blood pressure, mean (SD), mmHg     | 86.6 (11.3)                 | 88.4 (12.8)                   | <.001 |
| Hypertension, n (%)                           | 3510 (57)                   | 820 (77)                      | <.001 |
| Diabetes, n (%)                               | 225 (4)                     | 187 (18)                      | <.001 |
| Angina pectoris, n (%)                        | 244 (4)                     | 152 (14)                      | <.001 |
| Myocardial infarction, n (%)                  | 160 (3)                     | 130 (12)                      | <.001 |
| Congestive heart failure, n (%)               | 123 (2)                     | 136 (13)                      | <.001 |
| Blood pressure lowering medication, n (%)     | 791 (13)                    | 252 (24)                      | <.001 |
| Alcohol consumption, median (IQR), grams/week | 7.0 (0–49)                  | 0 (0–24)                      | <.001 |
| Smoking status                                |                             |                               | <.001 |
| <i>non smoker, n (%)</i>                      | 3473 (57)                   | 526 (49)                      |       |
| <i>ex-smoker, n (%)</i>                       | 1264 (21)                   | 241 (23)                      |       |
| <i>current smoker, n (%)</i>                  | 1409 (23)                   | 294 (27)                      |       |
| Cholesterol, mean (SD), mg/dL                 | 267 (54)                    | 271 (58)                      | .051  |
| High-density lipoprotein, mean (SD), mg/dL    | 66 (15)                     | 62 (15)                       | <.001 |
| Triglycerides, mean (SD), mg/dL               | 58 (39)                     | 73 (22)                       | <.001 |
| Fasting glucose, mean (SD), mg/dL             | 95 (22)                     | 108 (47)                      | .001  |

Data are presented as means ± SD, medians (interquartile range [IQR]) or numbers (percentage). P values are based on Student's t-test, chi-square test and Mann-Whitney U test. To convert cholesterol, high-density lipoprotein and triglycerides from mg/dL to mmol/l multiply with 0.02586. To convert fasting glucose from mg/dL to mmol/l multiply with 0.05556.
